# Supplementary material for: General Practitioners’, Pharmacists’ and Parents’ Views on Antibiotic Use and Resistance in Malta: An Exploratory Qualitative Study
Source: Antibiotics (Basel). 2022 May 14;11(5):661. doi: 10.3390/antibiotics11050661 (PMC9137633; doi:10.3390/antibiotics11050661)
Supplement: Supplementary file 1 [file antibiotics-11-00661-s001.zip › Suppl material S1_FGD guide (GPs).pdf]

## SUPPLEMENTARY MATERIAL S1: FGD GUIDE – GPs

### 1. How do you think GPs can help in promoting *judicious* antibiotic consumption (for RTIs)?

- a. *What I mean by judicious is rational/appropriate consumption*

### 2. What challenges do you think GPs face when patients present with respiratory tract complaints in the community?

- a. What challenges have you personally faced as a GP?  
b. What can be done to alleviate these challenges?  
c. Do you have any suggestions for improvement?

### 3. As you probably know, medical reps are a common source of information on antibiotics and resistance for GPs. What are your thoughts on this?

- a. How does the pharmaceutical industry influence GPs?  
b. What do you think about these influences?

### 4. What are your views on the availability of up-to-date National guidelines, based on local microbial and resistance epidemiology, in Malta?

- a. How important and/or applicable are they for your practice?

### 5. Now that we have discussed this issue in greater detail, may you describe some situations in which you would prescribe antibiotics for respiratory tract infections?

- a. When could one consider this? Why?  
b. According to a Maltese study conducted in 2011, GPs antibiotic prescribing is mostly influenced by the following factors:

| <i>Patient characteristics</i>            | <i>Clinical presentation</i>                   |
|-------------------------------------------|------------------------------------------------|
| Age                                       | Ear infections                                 |
| Pregnancy/breastfeeding                   | Sinus infections                               |
| Chronic pulmonary disease                 | Throat infections                              |
| Difficult patients                        | Infections in the bronchi                      |
| Patients who return with the same problem | Productive cough with greenish sputum          |
| Socioeconomic factors                     | Fever higher than 100°F                        |
| Occupation                                | Shortness of breath                            |
|                                           | Pustular inflammation of the tonsils           |
|                                           | Signs of otitis media or externa               |
|                                           | Percussion tenderness over the frontal sinuses |
|                                           | Localized crepitations on chest auscultation   |
|                                           | Enlarged cervical lymph nodes                  |

- c. Agree/disagree? Why/why not?  
d. Are they valid factors?

29 e. Which other factors might you consider instead?

30

31 **6. The latest Eurobarometer data showed that the main reason for prescribed antibiotic**  
32 **use is cold, sore throat and flu.**

33 a. Why do you think this is so?

34 b. What can be done to improve?

35 c. What are your recommendations which could help improve antibiotic prescribing?
