# Supplementary material for: General Practitioners’, Pharmacists’ and Parents’ Views on Antibiotic Use and Resistance in Malta: An Exploratory Qualitative Study
Source: Antibiotics (Basel). 2022 May 14;11(5):661. doi: 10.3390/antibiotics11050661 (PMC9137633; doi:10.3390/antibiotics11050661)
Supplement: Supplementary file 1 [file antibiotics-11-00661-s001.zip › Suppl materials S2_FGD guide (parents).pdf]

## SUPPLEMENTARY MATERIAL S2: FGD GUIDE – PARENTS

### HEALTH-RELATED DECISION-MAKING

**1. Do you remember the last time you had a sore throat, runny nose, chesty cough and/or fever?**

- What did you do when you experienced these symptoms?
- Why did you do that?
- How would you have felt if you did not meet a medical professional/get treatment?

**2. If your own children had these symptoms, how would you act?**

- Would you act differently? If yes, how so?

### GENERAL KNOWLEDGE

**3. Can you tell me what you know about antibiotics?**

- What can they be used for?
- What should they not be used for?

**4. What do you think causes antibiotic resistance?**

- How problematic do you think antibiotic resistance is in Malta/the rest of the world?

### PATIENT-DOCTOR INTERACTION

*When you visit your doctor for a respiratory tract problem (give examples if necessary)...*

**5. What do you expect to get out of the visit?**

- What kind of medications?
- What kind of advice?

**6. Sometimes patients specifically ask their doctor for antibiotics. What do you think about this?**

- Have you ever done this before? May you explain the situation further?

### CLIENT-PHARMACIST RELATIONSHIP

*When you go to a pharmacist for a respiratory tract problem (give examples if necessary)...*

**7. How often do you visit a pharmacist without visiting a doctor first, if at all?**

**8. What do you expect from the pharmacist when you have a respiratory tract problem?**

- What kind of medications?
- What kind of advice?

**9. Sometimes clients specifically ask pharmacists for antibiotics. What do you think about this?**

- Have you ever done this before? May you explain the situation further?
- Would you do this even if the doctor did not prescribe antibiotics?

## **ANTIBIOTIC USE, STORAGE AND DISPOSAL**

**10. Sometimes people take antibiotics without consulting a doctor first. Have you ever done this or thought of doing this?**

- How do you get a hold of the antibiotics?

**11. How likely are you to follow your doctor's/pharmacist's instructions on how to take the antibiotics prescribed?**

- Why would you do that?

**12. Doctors sometimes choose to delay antibiotic prescriptions. What I mean is that they may either ask you to wait a couple of days and come back if symptoms get worse, or they might give you a prescription but instruct you not to buy it for a couple of days if symptoms get worse. What are your thoughts on this practice?**

- What would you do with the delayed prescription?

**13. Sometimes when you finish an antibiotic course you may end up with leftovers. What do you do with leftover antibiotics?**

- How do you use the leftovers?
- How do you dispose of the leftovers?

## **ROLE IN TACKLING ANTIBIOTIC RESISTANCE**

**14. Whose responsibility is it to help combat this problem?**

**15. How do you think we can combat this problem?**

- What can you do?
