# Supplementary material for: General Practitioners’, Pharmacists’ and Parents’ Views on Antibiotic Use and Resistance in Malta: An Exploratory Qualitative Study
Source: Antibiotics (Basel). 2022 May 14;11(5):661. doi: 10.3390/antibiotics11050661 (PMC9137633; doi:10.3390/antibiotics11050661)
Supplement: Supplementary file 1 [file antibiotics-11-00661-s001.zip › Suppl materials S3_FGD guide (pharmacists).pdf]

## **SUPPLEMENTARY MATERIAL S3: FGD GUIDE – PHARMACISTS**

### **AWARENESS AND UNDERSTANDING ON ANTIBIOTIC MISUSE AND ANTIBIOTIC RESISTANCE**

#### **1. How do you look upon antibiotic use and resistance in Malta?**

- What factors do you think are contributing to resistance in Malta?
- How, in your opinion, are antibiotics misused in Malta?

#### **2. How do you perceive the general population's awareness on antibiotic use and resistance?**

#### **3. What are your opinions on the prescribing practices of local GPs?**

### **ANTIBIOTIC DISPENSING BEHAVIOUR**

#### **4. When/under what circumstances do you dispense antibiotics?**

#### **5. At times antibiotics are dispensed without a prescription. Can you explain under what circumstances this could happen?**

- What factors influence your decision to dispense an antibiotic without a prescription?
- How would you choose what antibiotic to dispense?

#### **6. How often are antibiotic prescriptions retained?**

- When would you give the prescription back to the client?

#### **7. What would you likely do if a client comes with an old/expired antibiotic prescription?**

#### **8. Sometimes clients could insist that you dispense antibiotics to them. Has this ever happened to you?**

- How would you act in such situations?

#### **9. What do you understand by 'delayed antibiotic prescription'?**

- What are your opinions on this?
- How often do clients ask for the antibiotic despite it being delayed by the doctor?
- How do you act in such circumstances?

### **PHARMACIST-GP INTERACTION**

#### **10. How would you describe your relationship with GPs?**

- How often do you interact?
- How do you communicate about their prescriptions?

**11. How do you feel about pointing out inappropriate prescriptions/prescription errors to GPs?**

- What else could you do?

## **EDUCATIONAL INITIATIVES**

**12. How do you look upon your role as educator?**

## **PHARMACIST'S ROLE IN TACKLING ANTIBIOTIC RESISTANCE**

**13. Whose responsibility is it to help combat antibiotic misuse in the community and antibiotic resistance?**

- What can you do?
  - As pharmacists
  - As members of the community

## **SUGGESTIONS FOR SUITABLE INTERVENTIONS**

**14. What do you think needs to be done in Malta to tackle antibiotic misuse?**

- To improve the situation?
- To strengthen what is already working well?
